# Supplementary material for: Socioeconomic inequalities in the prevalence of complex multimorbidity in a Norwegian population: findings from the cross-sectional HUNT Study
Source: PubMed Central journal article supplement — BMJ Open. 2020 Jun 15;10(6):e036851. doi: 10.1136/bmjopen-2020-036851 (PMC7299021; doi:10.1136/bmjopen-2020-036851), 2020-06-15
Supplement: bmjopen-2020-036851supp003.pdf [file bmjopen-2020-036851supp003.pdf]

# Appendix C

**Table C1 Prevalence ratios (PR) and prevalence differences (PD) with 95% confidence intervals (CI) in complex multimorbidity between occupational groups in 5-year intervals (25 to 100 years), stratified by sex.**

| Age, years | Occup.* group | Women |        |      |       | Men    |      |      |        |      |      |        |      |
|------------|---------------|-------|--------|------|-------|--------|------|------|--------|------|------|--------|------|
|            |               | PR    | 95% CI |      | PD    | 95% CI |      | PR   | 95% CI |      | PD   | 95% CI |      |
| 25         | High          | 1.0   | ref    |      | 0.0   | ref    |      | 1.0  | ref    |      | 0.0  | ref    |      |
|            | Medium        | 1.58  | 1.34   | 1.88 | 0.08  | 0.05   | 0.10 | 1.30 | 1.03   | 1.63 | 0.03 | 0.00   | 0.05 |
|            | Low           | 2.34  | 2.02   | 2.72 | 0.18  | 0.15   | 0.20 | 2.06 | 1.69   | 2.50 | 0.09 | 0.07   | 0.11 |
| 30         | High          | 1.0   | ref    |      | 0.0   | ref    |      | 1.0  | ref    |      | 0.0  | ref    |      |
|            | Medium        | 1.47  | 1.28   | 1.68 | 0.08  | 0.05   | 0.11 | 1.28 | 1.05   | 1.55 | 0.03 | 0.01   | 0.06 |
|            | Low           | 2.06  | 1.84   | 2.32 | 0.19  | 0.16   | 0.21 | 1.92 | 1.63   | 2.26 | 0.10 | 0.08   | 0.13 |
| 35         | High          | 1.0   | ref    |      | 0.0   | ref    |      | 1.0  | ref    |      | 0.0  | ref    |      |
|            | Medium        | 1.36  | 1.23   | 1.51 | 0.08  | 0.06   | 0.11 | 1.26 | 1.07   | 1.47 | 0.04 | 0.01   | 0.06 |
|            | Low           | 1.82  | 1.67   | 2.00 | 0.19  | 0.16   | 0.22 | 1.79 | 1.56   | 2.04 | 0.12 | 0.09   | 0.14 |
| 40         | High          | 1.0   | ref    |      | 0.0   | ref    |      | 1.0  | ref    |      | 0.0  | ref    |      |
|            | Medium        | 1.27  | 1.18   | 1.37 | 0.08  | 0.05   | 0.11 | 1.24 | 1.09   | 1.40 | 0.04 | 0.02   | 0.07 |
|            | Low           | 1.62  | 1.52   | 1.73 | 0.19  | 0.16   | 0.21 | 1.66 | 1.50   | 1.84 | 0.13 | 0.10   | 0.15 |
| 45         | High          | 1.0   | ref    |      | 0.0   | ref    |      | 1.0  | ref    |      | 0.0  | ref    |      |
|            | Medium        | 1.19  | 1.13   | 1.26 | 0.07  | 0.05   | 0.09 | 1.21 | 1.10   | 1.33 | 0.05 | 0.03   | 0.08 |
|            | Low           | 1.45  | 1.39   | 1.53 | 0.17  | 0.15   | 0.19 | 1.55 | 1.43   | 1.67 | 0.13 | 0.11   | 0.15 |
| 50         | High          | 1.0   | ref    |      | 0.0   | ref    |      | 1.0  | ref    |      | 0.0  | ref    |      |
|            | Medium        | 1.13  | 1.08   | 1.18 | 0.06  | 0.04   | 0.08 | 1.19 | 1.11   | 1.27 | 0.06 | 0.03   | 0.08 |
|            | Low           | 1.32  | 1.27   | 1.37 | 0.15  | 0.13   | 0.17 | 1.44 | 1.36   | 1.53 | 0.13 | 0.11   | 0.15 |
| 55         | High          | 1.0   | ref    |      | 0.0   | ref    |      | 1.0  | ref    |      | 0.0  | ref    |      |
|            | Medium        | 1.08  | 1.03   | 1.12 | 0.04  | 0.02   | 0.06 | 1.16 | 1.10   | 1.23 | 0.06 | 0.04   | 0.08 |
|            | Low           | 1.22  | 1.18   | 1.26 | 0.12  | 0.10   | 0.14 | 1.35 | 1.28   | 1.41 | 0.13 | 0.11   | 0.15 |
| 60         | High          | 1.0   | ref    |      | 0.0   | ref    |      | 1.0  | ref    |      | 0.0  | ref    |      |
|            | Medium        | 1.04  | 1.00   | 1.08 | 0.02  | 0.00   | 0.05 | 1.14 | 1.08   | 1.19 | 0.06 | 0.04   | 0.08 |
|            | Low           | 1.14  | 1.10   | 1.18 | 0.09  | 0.07   | 0.11 | 1.27 | 1.21   | 1.32 | 0.12 | 0.10   | 0.14 |
| 65         | High          | 1.0   | ref    |      | 0.0   | ref    |      | 1.0  | ref    |      | 0.0  | ref    |      |
|            | Medium        | 1.01  | 0.97   | 1.05 | 0.01  | -0.02  | 0.04 | 1.11 | 1.06   | 1.17 | 0.06 | 0.03   | 0.08 |
|            | Low           | 1.08  | 1.05   | 1.12 | 0.06  | 0.04   | 0.08 | 1.20 | 1.15   | 1.25 | 0.10 | 0.08   | 0.13 |
| 70         | High          | 1.0   | ref    |      | 0.0   | ref    |      | 1.0  | ref    |      | 0.0  | ref    |      |
|            | Medium        | 0.99  | 0.96   | 1.03 | 0.00  | -0.03  | 0.02 | 1.09 | 1.04   | 1.14 | 0.05 | 0.03   | 0.08 |
|            | Low           | 1.05  | 1.01   | 1.08 | 0.04  | 0.01   | 0.06 | 1.15 | 1.10   | 1.20 | 0.09 | 0.06   | 0.11 |
| 75         | High          | 1.0   | ref    |      | 0.0   | ref    |      | 1.0  | ref    |      | 0.0  | ref    |      |
|            | Medium        | 0.98  | 0.95   | 1.02 | -0.01 | -0.04  | 0.02 | 1.07 | 1.02   | 1.12 | 0.05 | 0.02   | 0.08 |
|            | Low           | 1.02  | 0.99   | 1.05 | 0.02  | -0.01  | 0.04 | 1.10 | 1.06   | 1.15 | 0.07 | 0.04   | 0.10 |

|     |        |      |      |      |       |       |      |      |      |      |      |       |      |
|-----|--------|------|------|------|-------|-------|------|------|------|------|------|-------|------|
| 80  | High   | 1.0  | ref  |      | 0.0   | ref   |      | 1.0  | ref  |      | 0.0  | ref   |      |
|     | Medium | 0.98 | 0.95 | 1.01 | -0.02 | -0.04 | 0.01 | 1.06 | 1.01 | 1.11 | 0.04 | 0.01  | 0.08 |
|     | Low    | 1.00 | 0.98 | 1.03 | 0.00  | -0.02 | 0.02 | 1.07 | 1.02 | 1.12 | 0.05 | 0.02  | 0.08 |
| 85  | High   | 1.0  | ref  |      | 0.0   | ref   |      | 1.0  | ref  |      | 0.0  | ref   |      |
|     | Medium | 0.98 | 0.95 | 1.00 | -0.02 | -0.04 | 0.00 | 1.04 | 1.00 | 1.09 | 0.03 | 0.00  | 0.07 |
|     | Low    | 0.99 | 0.97 | 1.02 | -0.01 | -0.03 | 0.01 | 1.05 | 1.00 | 1.09 | 0.04 | 0.00  | 0.07 |
| 90  | High   | 1.0  | ref  |      | 0.0   | ref   |      | 1.0  | ref  |      | 0.0  | ref   |      |
|     | Medium | 0.98 | 0.96 | 1.00 | -0.02 | -0.04 | 0.00 | 1.03 | 0.99 | 1.07 | 0.03 | -0.01 | 0.06 |
|     | Low    | 0.99 | 0.97 | 1.01 | -0.01 | -0.03 | 0.01 | 1.03 | 0.99 | 1.07 | 0.02 | -0.01 | 0.05 |
| 95  | High   | 1.0  | ref  |      | 0.0   | ref   |      | 1.0  | ref  |      | 0.0  | ref   |      |
|     | Medium | 0.98 | 0.96 | 1.00 | -0.02 | -0.04 | 0.00 | 1.02 | 0.99 | 1.06 | 0.02 | -0.01 | 0.05 |
|     | Low    | 0.99 | 0.97 | 1.00 | -0.01 | -0.03 | 0.00 | 1.02 | 0.98 | 1.05 | 0.01 | -0.02 | 0.04 |
| 100 | High   | 1.0  | ref  |      | 0.0   | ref   |      | 1.0  | ref  |      | 0.0  | ref   |      |
|     | Medium | 0.98 | 0.97 | 1.00 | -0.02 | -0.03 | 0.00 | 1.02 | 0.99 | 1.05 | 0.02 | -0.01 | 0.04 |
|     | Low    | 0.98 | 0.97 | 1.00 | -0.01 | -0.03 | 0.00 | 1.01 | 0.98 | 1.04 | 0.01 | -0.02 | 0.03 |

\*Occup. = occupational
