# Supplementary material for: Socioeconomic inequalities in the prevalence of complex multimorbidity in a Norwegian population: findings from the cross-sectional HUNT Study
Source: PubMed Central journal article supplement — BMJ Open. 2020 Jun 15;10(6):e036851. doi: 10.1136/bmjopen-2020-036851 (PMC7299021; doi:10.1136/bmjopen-2020-036851), 2020-06-15
Supplement: bmjopen-2020-036851supp004.pdf [file bmjopen-2020-036851supp004.pdf]

## Appendix D – Sensitivity analysis

In the sensitivity analysis the outcome complex multimorbidity was created from available conditions in the main questionnaire only. In total 22 conditions, grouped in 12 *ICD-10* chapters were included vs 51 conditions, grouped in 14 *ICD-10* chapters in the original measure.

The sensitivity analysis was performed to investigate if fewer number and types of conditions included in the complex multimorbidity measure, produced a similar pattern with respect to the overall prevalence as well as differences between occupational groups.

Total prevalences and prevalences by occupational group and age, stratified by sex (table D1), were obtained by cross tables.

**Table D1. Sociodemographic distribution of complex multimorbidity**

|                           | Women        |      |               | Men  |                 |       |              |      |               |      |                 |       |
|---------------------------|--------------|------|---------------|------|-----------------|-------|--------------|------|---------------|------|-----------------|-------|
|                           | No, <i>n</i> | (%)  | Yes, <i>n</i> | (%)  | Total, <i>n</i> | (%)   | No, <i>n</i> | (%)  | Yes, <i>n</i> | (%)  | Total, <i>n</i> | (%)   |
| <b>Total</b>              | 17376        | (83) | 3437          | (17) | 20813           | (100) | 14815        | (86) | 2399          | (14) | 17214           | (100) |
| <b>Occupational group</b> |              |      |               |      |                 |       |              |      |               |      |                 |       |
| High                      | 4032         | (90) | 473           | (11) | 4505            | (100) | 4026         | (90) | 439           | (10) | 4465            | (100) |
| Middle                    | 4612         | (86) | 774           | (14) | 5386            | (100) | 4147         | (85) | 710           | (15) | 4857            | (100) |
| Low                       | 8732         | (80) | 2190          | (20) | 10922           | (100) | 6642         | (84) | 1250          | (16) | 7892            | (100) |
| <b>Age, years</b>         |              |      |               |      |                 |       |              |      |               |      |                 |       |
| 25-44                     | 5610         | (94) | 371           | (6)  | 5981            | (100) | 3776         | (96) | 167           | (4)  | 3943            | (100) |
| 45-64                     | 8233         | (84) | 1607          | (16) | 9840            | (100) | 7381         | (88) | 985           | (12) | 8366            | (100) |
| 65-74                     | 2331         | (74) | 837           | (26) | 3168            | (100) | 2417         | (78) | 676           | (22) | 3093            | (100) |
| 75-100                    | 1202         | (66) | 622           | (34) | 1824            | (100) | 1241         | (68) | 571           | (32) | 1812            | (100) |
| Mean, (SD)                | 53           | (14) | 62            | (13) | 54              | (14)  | 55           | (14) | 65            | (12) | 56              | (14)  |

Prevalence ratios and differences between occupational groups at ages 30, 55, 75 and 90 years were derived from logistic regression estimates (table D2).

**Table D2. Prevalence ratios (PR) and prevalence differences (PD) with 95% confidence intervals (CI) in complex multimorbidity between occupational classes, stratified by sex.**

| Age, years | Occupational group | Women |              |       |                | Men  |              |      |              |
|------------|--------------------|-------|--------------|-------|----------------|------|--------------|------|--------------|
|            |                    | PR    | 95% CI       | PD    | 95% CI         | PR   | 95% CI       | PD   | 95% CI       |
| 30         | High               | 1.00  | (ref.)       | 0.00  | (ref.)         | 1.00 | (ref.)       | 0.00 | (ref.)       |
|            | Middle             | 1.91  | (1.41, 2.57) | 0.02  | (0.01, 0.03)   | 1.28 | (0.88, 1.86) | 0.01 | (0.00, 0.01) |
|            | Low                | 3.47  | (2.68, 4.49) | 0.05  | (0.04, 0.06)   | 1.96 | (1.42, 2.71) | 0.02 | (0.01, 0.03) |
| 55         | High               | 1.00  | (ref.)       | 0.00  | (ref.)         | 1.00 | (ref.)       | 0.00 | (ref.)       |
|            | Middle             | 1.18  | (1.05, 1.33) | 0.02  | (0.01, 0.03)   | 1.31 | (1.13, 1.52) | 0.02 | (0.01, 0.04) |
|            | Low                | 1.59  | (1.44, 1.76) | 0.07  | (0.05, 0.08)   | 1.68 | (1.48, 1.91) | 0.05 | (0.04, 0.06) |
| 75         | High               | 1.00  | (ref.)       | 0.00  | (ref.)         | 1.00 | (ref.)       | 0.00 | (ref.)       |
|            | Middle             | 0.88  | (0.77, 1.01) | -0.04 | (-0.08, 0.00)  | 1.28 | (1.12, 1.47) | 0.06 | (0.03, 0.09) |
|            | Low                | 0.96  | (0.85, 1.08) | -0.01 | (-0.05, 0.02)  | 1.44 | (1.27, 1.64) | 0.09 | (0.06, 0.12) |
| 90         | High               | 1.00  | (ref.)       | 0.00  | (ref.)         | 1.00 | (ref.)       | 0.00 | (ref.)       |
|            | Middle             | 0.80  | (0.69, 0.93) | -0.12 | (-0.20, -0.04) | 1.23 | (1.03, 1.46) | 0.09 | (0.01, 0.16) |
|            | Low                | 0.78  | (0.69, 0.88) | -0.13 | (-0.20, -0.06) | 1.27 | (1.08, 1.50) | 0.10 | (0.04, 0.17) |
